# Supplementary material for: Synchronous Head and Neck Cancer and Superficial Esophageal Squamous Cell Neoplasm: Endoscopic Treatment or No Treatment for the Superficial Esophageal Neoplasm
Source: MDPI journal article supplement (doi:10.3390/cancers15041079), 2023-02-08
Supplement: s1 [file s1]

Figure S1. Therapeutic guideline for head and neck cancer in our institution

|                                                  |                                                                                  |                                                                                 |                                                                                                                                                                                                                             |                 |         |
|--------------------------------------------------|----------------------------------------------------------------------------------|---------------------------------------------------------------------------------|-----------------------------------------------------------------------------------------------------------------------------------------------------------------------------------------------------------------------------|-----------------|---------|
| Squamous Cell Carcinoma of Head and Neck (SCCHN) | → Resectable, Oral Cavity                                                        | → Surgery                                                                       | No following risk factor                                                                                                                                                                                                    | → Observation   | p.3     |
|                                                  |                                                                                  |                                                                                 | Tongue cancer with extrinsic muscle extension; pT4 (exclude tumor >4cm and DOI >10mm), or pT3N1, or pT1-2N1 (level IV/V), or close margin ≤ 2mm, or poorly differentiation with tumor depth ≥ 4mm, or =2 minor risk factors | → Adjuvant RT   |         |
|                                                  |                                                                                  |                                                                                 | ENE (+), or margin (+), or ≥ pN2b, or ≥ 3 minor risk factors                                                                                                                                                                | → Adjuvant CCRT |         |
|                                                  | → Unresectable/Inoperable/ Low surgical curability, Oral Cavity                  | → CCRT<br>→ Bio -radiotherapy<br>→ Neoadjuvant CT → CCRT or Bio -radiotherapy   |                                                                                                                                                                                                                             |                 | p.4-5   |
|                                                  | → Resectable, Oropharynx/Hypopharynx/Larynx                                      | → Surgery                                                                       | No following risk factor                                                                                                                                                                                                    | → Observation   | p.6     |
|                                                  |                                                                                  |                                                                                 | pT4, or pT3N1, pT1-2N1 (level IV/V) or close margin ≤ 2mm, or poorly differentiation, or = 2 minor risk factors                                                                                                             | → Adjuvant RT   |         |
|                                                  |                                                                                  |                                                                                 | ENE (+), or margin (+), or pN2b, or ≥ 3 minor risk factors                                                                                                                                                                  | → Adjuvant CCRT |         |
|                                                  | → Resectable, Oropharynx /Hypopharynx/Larynx                                     | → Endoscopic surgery or RT alone<br>→ CCRT<br>→ Bio -radiotherapy               |                                                                                                                                                                                                                             |                 | p.7-10  |
|                                                  | → Unresectable/Inoperable/Low surgical curability, Oropharynx/Hypopharynx/Larynx | → CCRT<br>→ Bio -radiotherapy<br>→ Neoadjuvant CT → CCRT or Bio -radiotherapy   |                                                                                                                                                                                                                             |                 | p.11-12 |
|                                                  | → Recurrent/metastatic (if not considered with surgery or radiotherapy)          | → CT, Molecular Targeted therapy, Immuno-Oncologic therapy<br>→ Clinical trials |                                                                                                                                                                                                                             |                 | p.13    |
